# Supplementary material
Source: PubMed Central journal article supplement (PMC9034660)
Supplement: NIHMS1790043-supplement-supplementary_material.pdf [file NIHMS1790043-supplement-supplementary_material.pdf]

# Supplemental Material

## Appendix A:

### Systematic Review of Complications Associated with Stellate Ganglion Nerve Block: Search Strategies

All searches were conducted on November 27, 2018.

#### Ovid MEDLINE

|    |                                                                                                                                                                                                                                                                                                                            |
|----|----------------------------------------------------------------------------------------------------------------------------------------------------------------------------------------------------------------------------------------------------------------------------------------------------------------------------|
| 12 | limit 11 to (english language and yr="1990 -Current")                                                                                                                                                                                                                                                                      |
| 11 | limit 10 to yr="1990 -Current"                                                                                                                                                                                                                                                                                             |
| 10 | 3 and 9                                                                                                                                                                                                                                                                                                                    |
| 9  | 4 or 8                                                                                                                                                                                                                                                                                                                     |
| 8  | 5 or 6 or 7                                                                                                                                                                                                                                                                                                                |
| 7  | chemodenervation.ti,ab,kw.                                                                                                                                                                                                                                                                                                 |
| 6  | neurolys?s.ti,ab,kw.                                                                                                                                                                                                                                                                                                       |
| 5  | "block*".ab,kw,ti.                                                                                                                                                                                                                                                                                                         |
| 4  | exp Nerve Block/                                                                                                                                                                                                                                                                                                           |
| 3  | 1 or 2                                                                                                                                                                                                                                                                                                                     |
| 2  | ((cervicothoracic* or stellate or stellatum or satellite) adj3 gangli*).mp. [mp=title, abstract, original title, name of substance word, subject heading word, floating sub-heading word, keyword heading word, protocol supplementary concept word, rare disease supplementary concept word, unique identifier, synonyms] |
| 1  | Stellate Ganglion/                                                                                                                                                                                                                                                                                                         |

#### Cochrane Library (including CENTRAL)

| ID | Search                                                                    |
|----|---------------------------------------------------------------------------|
| #1 | MeSH descriptor: [Stellate Ganglion] explode all trees                    |
| #2 | ((cervicothoracic* or stellate or stellatum or satellite) near/3 gangli*) |
| #3 | #1 or #2                                                                  |

|     |                                                          |
|-----|----------------------------------------------------------|
| #4  | MeSH descriptor: [Nerve Block] explode all trees         |
| #5  | block*:ti,ab,kw                                          |
| #6  | neurolys?s:ti,ab,kw (Word variations have been searched) |
| #7  | chemodenervation:ti,ab,kw                                |
| #8  | #5 or #6 or #7                                           |
| #9  | #4 or #8                                                 |
| #10 | #3 and #9                                                |

## Embase

| No. | Query                                                                      |
|-----|----------------------------------------------------------------------------|
| #12 | #3 AND #9 AND [english]/lim AND [1990-2018]/py                             |
| #11 | #3 AND #9 AND [english]/lim                                                |
| #10 | #3 AND #9                                                                  |
| #9  | #4 OR #8                                                                   |
| #8  | #5 OR #6 OR #7                                                             |
| #7  | chemodenervation                                                           |
| #6  | neurolys?s                                                                 |
| #5  | block*                                                                     |
| #4  | 'nerve block'/exp                                                          |
| #3  | #1 OR #2                                                                   |
| #2  | (cervicothoracic* OR stellate OR stellatum OR satellite)<br>NEAR/3 gangli* |
| #1  | 'stellate ganglion'/exp                                                    |

## Scopus

(( TITLE-ABS-KEY ( ( cervicothoracic\* OR stellate OR stellatum OR satellite ) W/3 gangli\* )) AND (( TITLE-ABS-KEY ( block\* )) OR ( TITLE-ABS-KEY ( neurolys?s )) OR ( TITLE-ABS-KEY ( chemodenervation )))) AND PUBYEAR > 1990 AND ( LIMIT-TO ( LANGUAGE , "English" ) )

## Web of Science

|  |  |
|--|--|
|  |  |
|--|--|

|     |                                                                                                                                                                                                             |
|-----|-------------------------------------------------------------------------------------------------------------------------------------------------------------------------------------------------------------|
| # 7 | (#6) AND LANGUAGE: (English)<br><i>Indexes=SCI-EXPANDED, SSCI, A&amp;HCI, CPCI-S, CPCI-SSH, BKCI-S, BKCI-SSH, CCR-EXPANDED, IC Timespan=1990-2018</i>                                                       |
| # 6 | #5 AND #1<br><i>Indexes=SCI-EXPANDED, SSCI, A&amp;HCI, CPCI-S, CPCI-SSH, BKCI-S, BKCI-SSH, CCR-EXPANDED, IC Timespan=1990-2018</i>                                                                          |
| # 5 | #4 OR #3 OR #2<br><i>Indexes=SCI-EXPANDED, SSCI, A&amp;HCI, CPCI-S, CPCI-SSH, BKCI-S, BKCI-SSH, CCR-EXPANDED, IC Timespan=1990-2018</i>                                                                     |
| # 4 | TS=chemodenervation<br><i>Indexes=SCI-EXPANDED, SSCI, A&amp;HCI, CPCI-S, CPCI-SSH, BKCI-S, BKCI-SSH, CCR-EXPANDED, IC Timespan=1990-2018</i>                                                                |
| # 3 | TS=neurolys?s<br><i>Indexes=SCI-EXPANDED, SSCI, A&amp;HCI, CPCI-S, CPCI-SSH, BKCI-S, BKCI-SSH, CCR-EXPANDED, IC Timespan=1990-2018</i>                                                                      |
| # 2 | TS=block*<br><i>Indexes=SCI-EXPANDED, SSCI, A&amp;HCI, CPCI-S, CPCI-SSH, BKCI-S, BKCI-SSH, CCR-EXPANDED, IC Timespan=1990-2018</i>                                                                          |
| # 1 | TS=( ( cervicothoracic* OR stellate OR stellatum OR satellite ) NEAR/3 (gangli* ))<br><i>Indexes=SCI-EXPANDED, SSCI, A&amp;HCI, CPCI-S, CPCI-SSH, BKCI-S, BKCI-SSH, CCR-EXPANDED, IC Timespan=1990-2018</i> |

## CINAHL

| #   | Query                                      | Limiters/Expanders                                                                                                |
|-----|--------------------------------------------|-------------------------------------------------------------------------------------------------------------------|
| S10 | S1 AND S7                                  | Limiters - Published Date:<br>19900101-20181231<br>Narrow by Language: - english<br>Search modes - Boolean/Phrase |
| S9  | S1 AND S7                                  | Limiters - Published Date:<br>19900101-20181231<br>Search modes - Boolean/Phrase                                  |
| S8  | S1 AND S7                                  | Search modes - Boolean/Phrase                                                                                     |
| S7  | S2 OR S6                                   | Search modes - Boolean/Phrase                                                                                     |
| S6  | S3 OR S4 OR S5                             | Search modes - Boolean/Phrase                                                                                     |
| S5  | TI chemodenervation OR AB chemodenervation | Search modes - Boolean/Phrase                                                                                     |
| S4  | TI neurolys?s OR AB neurolys?s             | Search modes - Boolean/Phrase                                                                                     |
| S3  | TI block* OR AB block*                     | Search modes - Boolean/Phrase                                                                                     |

|    |                                                                     |                               |
|----|---------------------------------------------------------------------|-------------------------------|
| S2 | (MH "Nerve Block+")                                                 | Search modes - Boolean/Phrase |
| S1 | (cervicothoracic* or stellate or stellatum or satellite) N3 gangli* | Search modes - Boolean/Phrase |

**ClinicalTrials.gov**

stellate | ( ganglion OR ganglia ) AND ( block OR blockade )

## Appendix B:

Table 1: Potential list of complications associated with SGNB

| Systemic Complications                 | Local Injury related Complications |
|----------------------------------------|------------------------------------|
| Seizures                               | <i>Thyroid</i>                     |
| Spinal block (subdural or Intraspinal) | Hematoma                           |
| Hypo/hypertension                      | <i>Lung</i>                        |
| Allergic reactions                     | Pneumothorax                       |
| Injection in the wrong space           | Hemothorax                         |
| Arrhythmias                            | <i>Nerves</i>                      |
| Autonomic imbalance                    | RLN injury                         |
| Death                                  | Horner's Syndrome                  |
|                                        | Brachial Plexus Injury             |
|                                        | Phrenic nerve                      |
|                                        | Transient locked-in syndrome       |
|                                        | Vagal nerve                        |
|                                        | <i>Esophagus</i>                   |
|                                        | Perforation                        |
|                                        | <i>Vascular structures</i>         |
|                                        | Dissection                         |
|                                        | Thrombosis                         |
|                                        | Retropharyngeal Hematoma           |

|  |                                                                                                                   |
|--|-------------------------------------------------------------------------------------------------------------------|
|  | <p><i>Thoracic duct</i></p> <p>Chylothorax</p> <p><i>Infections</i></p> <p>Meningitis</p> <p>Cervical abscess</p> |
|--|-------------------------------------------------------------------------------------------------------------------|

**Appendix C: Expanded table illustrating characteristics associated with SGNB complication cases included in the study**



| <b>First Author</b>      | <b>Year</b> | <b>Type<br/>1=Landmark<br/>2=Fluoroscopy<br/>3=USG<br/>4=USG and Fluoroscopy<br/>5=Unspecified</b> | <b>Population</b>            | <b>Total Number of Patients in the SGNB arm</b> | <b>Complications</b> | <b>Rates (%)</b> | <b>Volume of Injectate</b> | <b>Drug</b>       | <b>Complications</b>                             | <b>USG Approach<br/>1= Out of plane<br/>2= In plane</b> |
|--------------------------|-------------|----------------------------------------------------------------------------------------------------|------------------------------|-------------------------------------------------|----------------------|------------------|----------------------------|-------------------|--------------------------------------------------|---------------------------------------------------------|
| Manchikanti <sup>1</sup> | 1990        | 1                                                                                                  | brachial plexus neuropathy   | 1                                               | 1                    | 100              | 16                         | 0.5% lidocaine    | Bilateral Horner's Syndrome                      |                                                         |
| Stannard <sup>2</sup>    | 1990        | 1                                                                                                  | arm pain                     | 1                                               | 1                    | 100              | NA                         | NA*               | dural puncture                                   |                                                         |
| Bruyns <sup>3</sup>      | 1991        | 1                                                                                                  | causalgia                    | 1                                               | 1                    | 100              | 10                         | 0.5% bupivacaine  | subdural block                                   |                                                         |
| Watanabe <sup>4</sup>    | 1991        | 1                                                                                                  | deafness                     | 1                                               | 1                    | 100              | 5                          | mepivacaine       | myoclonus                                        |                                                         |
| Mckay <sup>5</sup>       | 1992        | 5                                                                                                  | SGNB patients                | 6                                               | 6                    | 100              | NA                         | NA                | hypertension (6)                                 |                                                         |
| Noda <sup>6</sup>        | 1992        | NA                                                                                                 | sensineural deafness         | 1                                               | 1                    | 100              | 6-8ml                      | 0.25% bupivacaine | hemomediastinum after heparinization             |                                                         |
| Dukes <sup>7</sup>       | 1993        | 1                                                                                                  | Raynaud's syndrome           | 1                                               | 1                    | 100              | 2.5                        | 0.25% bupivacaine | transient locked in syndrome                     |                                                         |
| Naveira <sup>8</sup>     | 1993        | 1                                                                                                  | RSD                          | 2                                               | 2                    | 100              | 10                         | 0.5% bupivacaine  | persistent cough                                 |                                                         |
| Omote <sup>9</sup>       | 1993        | 1                                                                                                  | progressive sys sclerosis    | 2                                               | 2                    | 100              | 6                          | 1% lidocaine      | Raynaud's on contralateral side                  |                                                         |
| Wallace <sup>10</sup>    | 1993        | 1                                                                                                  | post herpetic neuralgia, RSD | 2                                               | 2                    | 100              | 15                         | 0.25% bupivacaine | Bilateral sympathetic block, Bilateral RLN block |                                                         |
| Hogan <sup>11</sup>      | 1994        | 1                                                                                                  | SGNB patients                |                                                 | 12                   | 100              | 10-12ml                    | 1% lidocaine      | hoarseness (8), brachial plexus block (2),       |                                                         |

|                         |      |   |                                    |     |    |      |      |                            |                                                                             |  |
|-------------------------|------|---|------------------------------------|-----|----|------|------|----------------------------|-----------------------------------------------------------------------------|--|
|                         |      |   |                                    |     |    |      |      |                            | headache (1),<br>difficulty<br>swallowing (1)                               |  |
| Masuda <sup>12</sup>    | 1994 | 1 | volunteer                          | 1   | 1  | 100  | 8    | mepivacaine                | sinus arrest                                                                |  |
| Lehmann <sup>13</sup>   | 1996 | 5 | RSD                                | 1   | 1  | 100  | 12   | 0.25%<br>bupivacaine       | migraine                                                                    |  |
| Devulder <sup>14</sup>  | 1997 | 5 | Causalgia                          | 1   | 1  | 100  | 10ml | 0.5%<br>bupivacaine        | reading<br>difficulties                                                     |  |
| Saruki <sup>15</sup>    | 1997 | 5 | shoulder and<br>neck pain          | 1   | 1  | 100  | 6    | 1%<br>mepivacaine          | subdural block                                                              |  |
| Mishio <sup>16</sup>    | 1998 | 1 | hearing loss                       | 1   | 1  | 100  | 7    | 1%<br>mepivacaine          | hemorrhage                                                                  |  |
| Kashiwagi <sup>17</sup> | 1999 | 1 | Bell's palsy                       | 1   | 1  | 100  | 5ml  | 1%<br>mepivacaine          | death - airway<br>obstruction and<br>post tracheal<br>hematoma <sup>o</sup> |  |
| Kay <sup>18</sup>       | 1999 | 1 | SGNB<br>patients                   | 50  | 1  | 2    | 12   | 0.25%<br>bupivacaine       | brachial plexus<br>block w hemi<br>diaphragmatic<br>paralysis               |  |
| Harano <sup>19</sup>    | 2000 | 2 | Surgical<br>sympathetecto<br>my    | 188 | 10 | 5.32 | 6ml  | 0.03%<br>methylene<br>blue | intrathoracic<br>bleeding (6),<br>hematoma (4) <sup>π</sup>                 |  |
| Drolet <sup>20</sup>    | 2001 | 1 | pain and aide<br>healing           | 1   | 1  | 100  | 10   | NA                         | LMA puncture                                                                |  |
| Leong <sup>21</sup>     | 2001 | 1 | CRPS                               | 1   | 1  | 100  | 13   | 0.25%<br>bupivacaine       | delayed subdural                                                            |  |
| Vadodaria <sup>22</sup> | 2001 | 1 | neck pain                          | 1   | 1  | 100  | 10   | 0.25%<br>bupivacaine       | quadriplegic                                                                |  |
| Mahli <sup>23</sup>     | 2002 | 1 | Raynaud's,<br>Buerger's<br>disease | 2   | 2  | 100  | 5    | 1% lidocaine               | seizure                                                                     |  |
| Okuda <sup>24</sup>     | 2003 | 1 | neck shoulder<br>pain              | 1   | 1  | 100  | 8    | 1%<br>mepivacaine          | hematoma                                                                    |  |

|                             |      |   |                                  |    |    |      |        |                    |                                    |  |
|-----------------------------|------|---|----------------------------------|----|----|------|--------|--------------------|------------------------------------|--|
| Tuz <sup>25</sup>           | 2003 | 5 | hearing loss                     | 1  | 1  | 100  | 10     | prilocaine         | locked in syndrome                 |  |
| Lake <sup>26</sup>          | 2004 | 1 | shoulder pain                    | 1  | 1  | 100  | 10     | 0.5% bupivacaine   | persistent ptosis                  |  |
| Masuda <sup>27</sup>        | 2004 | 1 | facial pain                      | 1  | 1  | 100  | NA     | NA                 | cervical abscess                   |  |
| Saxena <sup>28</sup>        | 2004 | 1 | shoulder hand pain               | 1  | 1  | 100  | 11     | 1.5% lidocaine     | sinus arrest                       |  |
| Kimura <sup>29</sup>        | 2005 | 1 | SGNB patients                    | 7  | 7  | 100  | 5-8ml  | 1% mepivacaine     | hypertension                       |  |
| Balaban <sup>30</sup>       | 2005 | 1 | CRPS                             | 1  | 1  | 100  | 12     | 2% prilocaine      | delayed subdural                   |  |
| Shimada <sup>31</sup>       | 2005 | 1 | Ramsay hunt syndrome             | 1  | 1  | 100  | 5      | 1% lidocaine       | cervical spondylitis               |  |
| Gwak <sup>32</sup>          | 2006 | 1 | Neuropathic pain syndromes       | 40 | 13 | 32.5 | 6ml    | 1% mepivacaine     | hoarseness                         |  |
| Belena <sup>33</sup>        | 2006 | 1 | CRPS                             | 1  | 1  | 100  | 8      | 0.375% ropivacaine | left migraine headache             |  |
| Kurimoto <sup>34</sup>      | 2006 | 5 | Central retinal artery occlusion | 1  | 1  | 100  | NA     | NA                 | visual hallucinations              |  |
| Peatfield <sup>35</sup>     | 2007 | 5 | Head ache                        | 1  | 1  | 100  | NA     | NA                 | severe headache for 6 weeks        |  |
| Song <sup>36</sup>          | 2009 | 1 | Volunteers                       | 20 | 1  | 5    | 8ml    | 1% lidocaine       | dysphagia and dizziness            |  |
| Radhakrishnan <sup>37</sup> | 2009 | 1 | CRPS                             | 1  | 1  | 100  | NA     | NA                 | Internal jugular venous thrombosis |  |
| Eyigor <sup>38</sup>        | 2009 | 2 | CRPS                             | 1  | 1  | 100  | 5      | lidocaine          | grand mal seizure                  |  |
| Takanami <sup>39</sup>      | 2009 | 5 | facial pain                      | 1  | 1  | 100  | NA     | NA                 | hematoma                           |  |
| Corsaro <sup>40</sup>       | 2009 | 1 | algodystrophy of upper arms      | 1  | 1  | 100  | 8-10ml | 0.25% bupivacaine  | Transient locked in syndrome       |  |

|                           |      |      |                                       |                 |    |      |       |                                 |                                                                                        |    |
|---------------------------|------|------|---------------------------------------|-----------------|----|------|-------|---------------------------------|----------------------------------------------------------------------------------------|----|
| Kulkarni <sup>41</sup>    | 2010 | 1    | Upper arm peripheral vascular disease | 20              | 25 | 100  | 10ml  | 2% lidocaine +0.25% bupivacaine | lightheadedness (16), bradycardia (2), hematoma (1), hoarseness (6)                    |    |
| Chaturvedi <sup>42</sup>  | 2010 | 1    | Brachial plexus injury                | 1               | 1  | 100  | 8ml   | 1% lidocaine                    | apnea, hypotension, locked in syndrome <sup>^</sup>                                    |    |
| Atici <sup>43</sup>       | 2010 | 1    | CRPS                                  | 1               | 1  | 100  | 6ml   | 0.25% bupivacaine               | coughing~                                                                              |    |
| Espinar <sup>44</sup>     | 2010 | 3    | CRPS                                  | 1               | 1  | 100  | 10    | bupivacaine                     | allergic reaction                                                                      | NA |
| Rastogi <sup>45</sup>     | 2010 | 3    | Facial pain                           | 1               | 1  | 100  | 10    | 0.5% bupivacaine                | Seizures and cardiac arrest                                                            | 2  |
| Nabil Abbas <sup>46</sup> | 2011 | 2    | Post mastectomy pain                  | 50 <sup>o</sup> | NA | 17.5 | 3ml   | 0.25% bupivacaine               | Hoarseness and lump sensation (8), cough (1), hematoma (17), brachial plexus block (9) |    |
| Jadon <sup>47</sup>       | 2011 | 2    | SGNB patients                         | 9               | 1  | 100  | 10    | 1% lidocaine +depo              | dyspnea                                                                                |    |
| Makharita <sup>48</sup>   | 2012 | 2    | Fascial pain                          | 61              | 13 | 21.3 | 8ml   | 0.125% bupivacaine $\pi$        | hoarseness (3), dysphagia (9), lower limb edema (1)                                    |    |
| Yoo <sup>49</sup>         | 2012 | 1, 3 | CRPS                                  | 42              | 2  | 4.7  | 5ml   | 0.5% lidocaine                  | hematoma (2) in the blind arm                                                          | 2  |
| Hashemi <sup>50</sup>     | 2012 | 3    | SGNB patients                         | 26 <sup>o</sup> | 4  | 15.3 | 5.5ml | 1% lidocaine + 0.5% bupivacaine | brachial plexus block and hoarseness (1), coughing (3)                                 | 2  |
| Sari <sup>51</sup>        | 2012 | 5    | CRPS                                  | 1               | 1  | 100  | NA    | NA                              | respiratory arrest                                                                     |    |
| Amhaz <sup>52</sup>       | 2013 | 1    | Raynaud's                             | 1               | 1  | 100  | 3ml   | 1% lidocaine                    | contralateral Horner's                                                                 |    |

|                        |      |     |                         |      |    |      |      |                                  |                                                                                                          |     |
|------------------------|------|-----|-------------------------|------|----|------|------|----------------------------------|----------------------------------------------------------------------------------------------------------|-----|
| Kim <sup>53</sup>      | 2013 | 2   | CRPS                    | 1    | 1  | 100  | 3    | 0.25% bupivacaine                | difficulty breathing                                                                                     |     |
| Shankar <sup>54</sup>  | 2013 | 3   | CRPS                    | 1    | 1  | 100  | 10   | 1% lidocaine+ 0.25% bupivacaine  | transient neuro injury                                                                                   | 1,2 |
| Othman <sup>55</sup>   | 2014 | 1   | Breast cancer survivors | 20   | 2  | 10   | 10ml | 0.5% bupivacaine                 | Blood shot conjunctive (1), hoarseness (1)                                                               |     |
| Kim <sup>56</sup>      | 2015 | 3   | SGNB patients           | 35   | 3  | 100  | 5ml  | 1% lidocaine                     | dyspnea (2), hoarseness (1)                                                                              | 2   |
| Park <sup>57</sup>     | 2015 | 3   | Herpes zoster           | 1    | 1  | 100  | 4ml  | 1% mepivacaine                   | Transient global amnesia                                                                                 | NA  |
| Uchida <sup>58</sup>   | 2015 | 5   | pain lower lip          | 1    | 1  | 100  | NA   | NA                               | venous hematoma                                                                                          |     |
| Ghai <sup>59</sup>     | 2016 | 3   | Upper extremity pain    | 20   | 3  | 15   | 6ml  | 0.25% bupivacaine                | hoarseness of voice                                                                                      | 2   |
| Hanling <sup>60</sup>  | 2016 | 3   | PTSD                    | 27   | NA | 13   | 5ml  | 0.5% ropivacaine                 | ptosis, dyspnea, increased anger/aggression, sore throat                                                 | 2   |
| Fujiwara <sup>61</sup> | 2016 | 3   | left facial paralysis   | 1    | 1  | 100  | 2    | 1% mepivacaine                   | arterial puncture-seizures                                                                               | NA  |
| Datta <sup>62</sup>    | 2017 | 3   | CRPS                    | 208† | 33 | 15.8 | 6ml  | 0.3% bupivacaine + dexamethasone | hoarseness/dysphagia (18), arm numbness (1), hematoma (11), pneumothorax (1), contralateral Horner's (1) | 1   |
| Kim <sup>63</sup>      | 2017 | 3   | SGNB patients           | 51   | 11 | 21.5 | 5ml  | 0.5% mepivacaine                 | dizziness (4), hoarseness (7)                                                                            | 2   |
| Karaman <sup>64</sup>  | 2017 | 1,2 | SGNB patients           | 420  | 22 | 5.2  | NA   | NA                               | blood aspiration (blind n=12, fluoroscopy n=8) and                                                       |     |

|                       |      |     |                                  |    |   |     |        |                      |                                                               |   |
|-----------------------|------|-----|----------------------------------|----|---|-----|--------|----------------------|---------------------------------------------------------------|---|
|                       |      |     |                                  |    |   |     |        |                      | Pneumothorax<br>(n= 2 in the blind<br>group)                  |   |
| Shaaban <sup>65</sup> | 2018 | 2,3 | Neuropathic<br>pain<br>syndromes | 40 | 3 | 7.5 | 3ml    | 2% lidocaine         | hematoma (2),<br>hoarseness (1)<br>both in<br>fluoroscopy arm | 1 |
| Abbas <sup>66</sup>   | 2018 | 3   | Post<br>mastectomy<br>pain       | 80 | 2 | 2.5 | 0.75ml | 2% lidocaine         | ptosis (2)                                                    | 1 |
| Vinod <sup>67</sup>   | 2018 | 4   | SGNB<br>patients                 | 10 | 3 | 30  | 4ml    | 0.25%<br>bupivacaine | hoarseness/<br>dysphagia                                      | 2 |

Table of SGNB associated complications with additional features included in the systematic review. NA- Not available, SGNB- stellate ganglion nerve block, RSD- reflux sympathetic dystrophy, RLN- recurrent laryngeal nerve, LMA- laryngeal mask airway, CRPS- complex regional pain syndrome.

Foot notes legends: \* Drug not injected due to CSF aspiration. ° Negative aspiration test reported. ∞ None required surgical intervention. ^ Symptoms developed after injection of 2ml of injectate and blood tinge was noted. ~ Multiple episodes of SGNB performed in the same patient. † A total of 334 SGNB performed in the study. ø 200 SGNB performed in the study. © 101 SGNB procedures performed in the study. ∏ 31 patients received saline.

## References

1. Manchikanti L. Bilateral horner's syndrome following stellate ganglion block. *Anesthesiology Review* 1990;17:41-43.
2. Stannard CF, Glynn CJ, Smith SP. Dural puncture during attempted stellate ganglion block. *Anaesthesia* 1990;45:952-954.
3. Bruyns T, Devulder J, Vermeulen H, De Colvenaer L, Rolly G. Possible inadvertent subdural block following attempted stellate ganglion blockade. *Anaesthesia* 1991;46:747-749.
4. Watanabe S, Tanaka M, Endo T. Myoclonus of hand and arm after ipsilateral stellate ganglion block. *Reg Anesth* 1991;16:186-7.
5. McKay WR, Rouine-Rapp K, Benson J, Wallace A, Miller RD. Hypertension following stellate ganglion blockade. *Regional Anesthesia* 1992;17:64.
6. Noda H, Kato S, Miyazaki T. Hemomediastinum induced by heparinization after stellate ganglion block. *Journal of Anesthesia* 1992;6:367-71.
7. Dukes RR, Alexander LA. Transient locked-in syndrome after vascular injection during stellate ganglion block. *Regional Anesthesia* 1993;18:378-380.
8. Naveira FA, Morales A. Treatment of persistent cough after stellate ganglion block. *Regional Anesthesia* 1993;18:312-4.
9. Omote K, Kawamata M, Namiki A. Adverse effects of stellate ganglion block on raynaud's phenomenon associated with progressive systemic sclerosis. *Anesthesia and Analgesia* 1993;77:1057-1060.
10. Wallace MS, Milholland AV. Contralateral spread of local anesthetic with stellate ganglion block. *Regional Anesthesia* 1993;18:55-59.
11. Hogan QH, Taylor ML, Goldstein M, Stevens R, Kettler R. Success rates in producing sympathetic blockade by paratracheal injection. *Clinical Journal of Pain* 1994;10:139-45.
12. Masuda A, Fujiki A. Sinus arrest after right stellate ganglion block. *Anesth Analg* 1994;79:607.
13. Lehmann LJ, Warfield CA, Bajwa ZH. Migraine headache following stellate ganglion block for reflex sympathetic dystrophy. *Headache* 1996;36:335-7.
14. Devulder J, DeLaat M. Stellate ganglion block alleviates pseudo-obstruction symptoms followed by episodes of hypermetropia - case report. *Regional Anesthesia* 1997;22:284-286.
15. Saruki N, Shiga T, Hasegawa M, Goto F. Rare complication after stellate ganglion block [1]. *Canadian Journal of Anaesthesia* 1997;44:784.
16. Mishio M, Matsumoto T, Okuda Y, Kitajima T. Delayed severe airway obstruction due to hematoma following stellate ganglion block. *Reg Anesth Pain Med* 1998;23:516-9.
17. Kashiwagi M, Ikeda N, Tsuji A, Kudo K. Sudden unexpected death following stellate ganglion block. *Legal Medicine* 1999;1:262-5.
18. Kay J, Lam-McCullough J, Carmody E. Incidence of hem 1 di a ph rac m paresis with stellate ganglion block. *Regional Anesthesia and Pain Medicine* 1999;24:56.
19. Harano K, Takasaki M, Taniguchi Y, Araki K. Intrathoracic bleeding following stellate ganglion block - observation under thoracoscopy. *Anesthesiology* 2000;93:U197-U197.
20. Drolet S. Puncture of the laryngeal mask airway during stellate ganglion block [10]. *Canadian Journal of Anesthesia* 2001;48:720.
21. Leong MS, Mackey S. Delayed subdural block after a stellate ganglion block. *Anesthesiology* 2001;94:358-359.
22. Vadodaria BS, Bridgens J, Richmond M. Pyogenic cervical epidural abscess and discitis following stellate ganglion block. *Anaesthesia* 2001;56:871-873.
23. Mahli A, Coskun D, Akcali DT. Aetiology of convulsions due to stellate ganglion block: A review and report of two cases. *European Journal of Anaesthesiology* 2002;19:376-380.

24. Okuda Y, Urabe K, Kitajima T. Retropharyngeal or cervicomedial haematomas following stellate ganglion block. *European Journal of Anaesthesiology* 2003;20:757-9.
25. Tüz M, Erodlu F, Dodru H, Uygur K, Yavuz L. Transient locked-in syndrome resulting from stellate ganglion block in the treatment of patients with sudden hearing loss. *Acta Anaesthesiologica Scandinavica* 2003;47:485-487.
26. Lake AP, Puvanachandra K. A complication of stellate ganglion block? *Pain Practice* 2004;4:130-1.
27. Masuda R, Yokoyama K, Inoue T, Ogawa R. Clinical evaluation of cervical pyogenic spondylitis/spondylodiscitis after stellate ganglion block. *Pain Clinic* 2004;16:89-96.
28. Saxena AK, Saxena N, Aggarwal B, Sethi AK. An unusual complication of sinus arrest following right-sided stellate ganglion block: A case report. *Pain Practice* 2004;4:245-8.
29. Kimura T, Nishiwaki K, Yokota S, Komatsu T, Shimada Y. Severe hypertension after stellate ganglion block. *British Journal of Anaesthesia* 2005;94:840-2.
30. Balaban B, Baklaci K, Ali Taskaynatan M, Mohur H. Delayed subdural block as an unusual complication following stellate ganglion blockade. *Pain Clinic* 2005;17:407-409.
31. Shimada Y, Marumo H, Kinoshita T, Suzuki M, Oya H. A case of cervical spondylitis during stellate ganglion block. *J Nippon Med Sch* 2005;72:295-9.
32. Gwak HJ, Son JS, Kim DK, Choi H, Han YJ. The utility of upper limb sympathetic block by modified injection technique in stellate ganglion block. *Korean journal of anesthesiology* 2006;50:685-688.
33. Beleña J, Petersen I, Cabeza R, Núñez M, Vidal A. Migraine headache: A rare complication after cervicothoracic block [1]. *Journal of Headache and Pain* 2006;7:367-368.
34. Kurimoto T, Takata M, Nishimura M, Tagami Y, Okamoto N, Mimura O. Visual hallucinations following stellate ganglion block in a patient with central retinal artery occlusion. *Jpn J Ophthalmol* 2006;50:567-9.
35. Peatfield R. Stellate ganglion block can exacerbate cluster headache. *Cephalalgia* 2007;27:614-614.
36. Song JG, Hwang GS, Lee EH et al. Effects of bilateral stellate ganglion block on autonomic cardiovascular regulation. *Circulation Journal* 2009;73:1909-13.
37. Radhakrishnan L, Mathews A, Lin ES, Jeyapalan K, Kotemane N. Thrombosis of internal jugular vein following stellate ganglion block. *Pain Practice* 2009;9:111-112.
38. Eyigor C, Erhan E, Yegul I. Grand mal seizure following stellate ganglion block after negative aspiration. *Pain Practice* 2009;9:37-38.
39. Takanami I, Abiko T, Koizumi S. Life-threatening airway obstruction due to retropharyngeal and cervicomedial hematomas following stellate ganglion block. *The Thoracic and cardiovascular surgeon* 2009;57:311-312.
40. Corsaro ME, Aveni F, Messina A et al. Clinical evidence on risk and complications of the stellate ganglion block: Transient locked-in syndrome. *Acta Medica Mediterranea* 2009;25:7-8.
41. Kulkarni KR, Kadam AI, Namazi IJ. Efficacy of stellate ganglion block with an adjuvant ketamine for peripheral vascular disease of the upper limbs. *Indian Journal of Anaesthesia* 2010;54:546-51.
42. Chaturvedi A, Dash HH. Locked-in syndrome during stellate ganglion block. *Indian Journal of Anaesthesia* 2010;54:324-326.
43. Atici S, Akoz K. Transient cough attacks after right stellate ganglion block. *Reg Anesth Pain Med* 2010;35:318-9.
44. Espinar González MJ, Sanchez del Aguila M, Marín Alonso I, Robles Dominguez F, Alonso Atienza P. Severe allergic reaction after bupivacaine injection for a stellate ganglion blockade. *Regional Anesthesia and Pain Medicine* 2010;35:E92.



45. Rastogi S, Tripathi S. Cardiac arrest following stellate ganglion block performed under ultrasound guidance. *Anaesthesia* 2010;65:1042.
46. Nabil Abbas D, Abd El Ghafar EM, Ibrahim WA, Omran AF. Fluoroscopic stellate ganglion block for postmastectomy pain: A comparison of the classic anterior approach and the oblique approach. *Clinical Journal of Pain* 2011;27:207-213.
47. Jadon A. Revalidation of a modified and safe approach of stellate ganglion block. *Indian Journal of Anaesthesia* 2011;55:52-56.
48. Makharita MY, Amr YM, El-Bayoumy Y. Effect of early stellate ganglion blockade for facial pain from acute herpes zoster and incidence of postherpetic neuralgia. *Pain Physician* 2012;15:467-474.
49. Yoo SD, Jung SS, Kim HS et al. Efficacy of ultrasonography guided stellate ganglion blockade in the stroke patients with complex regional pain syndrome. *Annals of Rehabilitation Medicine* 2012;36:633-9.
50. Hashemi SM. Ultrasonography-guided stellate ganglion block: A safe and effective method for chronic pain relief. *Regional Anesthesia and Pain Medicine* 2012;37:E256-E257.
51. Sari S, Aydin ON. Intraspinial blockade after stellate ganglion blockade in trauma patient. *Regional Anesthesia and Pain Medicine* 2012;37:E239-E240.
52. Amhaz HH, Manders L, Chidiac EJ, Pallekonda V, Chakraborty S. Unusual case of contralateral horner's syndrome following stellate-ganglion block: A case report and review of the literature. *Local & Regional Anesthesia* 2013;6:31-3.
53. Kim CH. Respiratory depression following stellate ganglion block. *PM and R* 2013;5:S309.
54. Shankar H, Simhan S. Transient neuronal injury followed by intravascular injection during an ultrasound guided stellate ganglion block. *Anesth* 2013;2:134-7.
55. Othman AH, Zaky AH. Management of hot flushes in breast cancer survivors: Comparison between stellate ganglion block and pregabalin. *Pain Medicine* 2014;15:410-7.
56. Kim MS, Yoon KB, Yoon DM, Kim DH. Effect of cervical sympathetic block on optic nerve sheath diameter measured by ultrasonography. *Ultrasound in Medicine and Biology* 2015;41:1599-1604.
57. Park S, Park S, Jang Y. Transient global amnesia after stellate ganglion block. *Journal of Anesthesia* 2015;29:643.
58. Uchida T, Nakao S, Morimoto M, Iwamoto T. Serious cervical hematoma after stellate ganglion block. *Journal of Anesthesia* 2015;29:321.
59. Ghai A, Kaushik T, Kundu ZS, Wadhera S, Wadhera R. Evaluation of new approach to ultrasound guided stellate ganglion block. *Saudi journal of anaesthesia* 2016;10:161-7.
60. Hanling SR, Hickey A, Lesnik I et al. Stellate ganglion block for the treatment of posttraumatic stress disorder: A randomized, double-blind, controlled trial. *Reg Anesth Pain Med* 2016;41:494-500.
61. Fujiwara S, Komazawa N, Kido H, Minami T. A rare case of accidental arterial local anesthetic injection under ultrasound-guided stellate ganglion block. *Journal of Clinical Anesthesia* 2016;29:3-4.
62. Datta R, Agrawal J, Sharma A, Rathore VS, Datta S. A study of the efficacy of stellate ganglion blocks in complex regional pain syndromes of the upper body. *Journal of Anaesthesiology Clinical Pharmacology* 2017;33:534-540.
63. Kim WJ, Park HS, Yi MS, Koo GH, Shin HY. Evaluation of lung function and clinical features of the ultrasound-guided stellate ganglion block with 2 different concentrations of a local anesthetic: A randomized controlled trial. *Anesth Analg* 2017;124:1311-1316.
64. Karaman H. Complications and success rates of stellate ganglion blockade; blind technique vs. Fluoroscopic guidance. *Biomedical Research (India)* 2017;28:1677-1682.

65. Shaaban MH, Reyad RM. Does ultrasound guidance improve the efficacy of pulsed radiofrequency therapy for the stellate ganglion in patients with refractory neuropathic pain syndromes. *CardioVascular and Interventional Radiology* 2017;40:S301.
66. Abbas DN, Reyad RM. Thermal versus super voltage pulsed radiofrequency of stellate ganglion in post-mastectomy neuropathic pain syndrome: A prospective randomized trial. *Pain Physician* 2018;21:351-362.
67. Vinod K, Kurhekar P, Sharanya K, Raghuraman MS. Efficacy of the stellate ganglion block through the lateral approach using ultrasonogram and fluoroscopy. *Turk anestezi reanim* 2018;46:393-398.

**Appendix D:** Complications associated with SGNB from registered randomized controlled clinical trials

| <b>First Author</b>    | <b>Year</b> | <b>Type<br/>1=Landmark<br/>2=Fluoroscopy<br/>3=USG<br/>4=USG and<br/>Fluoroscopy<br/>5=<br/>Unspecified</b> | <b>Population</b>                  | <b>Total<br/>Number<br/>of<br/>Patients<br/>in the<br/>SGNB<br/>arm</b> | <b>Complications</b> | <b>Rates<br/>(%)</b> | <b>Volume<br/>of<br/>Injectate</b> | <b>Drug</b>                     | <b>Complications<sup>β</sup></b>                                              |
|------------------------|-------------|-------------------------------------------------------------------------------------------------------------|------------------------------------|-------------------------------------------------------------------------|----------------------|----------------------|------------------------------------|---------------------------------|-------------------------------------------------------------------------------|
| Bonelli <sup>1</sup>   | 1983        | 5                                                                                                           | CRPS                               | 10                                                                      | NA                   |                      | 15ml                               | 0.5%<br>bupivacaine             |                                                                               |
| Harding <sup>2</sup>   | 1986        | 1                                                                                                           | Herpes Zoster<br>ophthalmicus      | 15                                                                      | 7                    | 46.67                | 9.5ml                              | 1% lidocaine +<br>0.5% marcaine | Bloody tap (2),<br>brachial block<br>(1), nystagmus<br>(1), hoarseness<br>(5) |
| Glynn <sup>3</sup>     | 1993        | 1                                                                                                           | Reflux<br>sympathetic<br>dystrophy | 6                                                                       | NA                   |                      | NA                                 | Bupivacaine                     |                                                                               |
| Kapral <sup>4</sup>    | 1995        | 1,3                                                                                                         | Reflux<br>sympathetic<br>dystrophy | 12                                                                      | 1                    | 8.33                 | 5-8ml <sup>#</sup>                 | 0.25%<br>bupivacaine            | 5ml in ultra<br>sound arm and 8<br>ml in blind,<br>RLN palsy                  |
| Ikeda <sup>5</sup>     | 1996        | 1                                                                                                           | Volunteers                         | 20                                                                      | 0                    | 0                    | 7ml                                | 1%<br>mepivacaine               |                                                                               |
| Inada <sup>6</sup>     | 1997        | 1                                                                                                           | SGNB patients                      | 30                                                                      | 0                    | 0                    | 6ml                                | 1%<br>mepivacaine               |                                                                               |
| Otake <sup>7*</sup>    | 1998        | 5                                                                                                           | CRPS                               | 33                                                                      | NA                   |                      | 6ml                                | 1%<br>mepivacaine               |                                                                               |
| Price <sup>8</sup>     | 1998        | 1                                                                                                           | CRPS                               | 7                                                                       | NA                   |                      | 15ml                               | 1% lidocaine                    |                                                                               |
| Fujino <sup>9</sup>    | 1999        | 1                                                                                                           | Sensineural<br>hearing loss        | 10                                                                      | NA                   |                      | 5ml                                | 1% lidocaine                    |                                                                               |
| Sugimoto <sup>10</sup> | 1999        | 1                                                                                                           | Volunteers                         | 9                                                                       | NA                   |                      | 6ml                                | 1% lidocaine                    |                                                                               |

|                           |      |   |                                      |                 |    |       |       |                           |                                                                                        |
|---------------------------|------|---|--------------------------------------|-----------------|----|-------|-------|---------------------------|----------------------------------------------------------------------------------------|
| Yokoyama <sup>11</sup>    | 2000 | 1 | Volunteers                           | 10              | NA |       | 7ml   | 1% lidocaine              |                                                                                        |
| Arai <sup>12</sup>        | 2004 | 1 | Knee arthroscopy                     | 10              | 0  | 0     | 10ml  | 1% lidocaine              |                                                                                        |
| Donmez <sup>13</sup>      | 2005 | 1 | Bypass surgery                       | 19              | NA |       | 15ml  | 0.5% bupivacaine          |                                                                                        |
| Yildirim <sup>14</sup>    | 2006 | 1 | AV fistula surgery                   | 25              | NA |       | 6ml   | 1% mepivacaine            |                                                                                        |
| Nishiyama <sup>15</sup>   | 2006 | 5 | Post herpetic neuralgia and deafness | 15              | NA |       | 6ml   | 1% mepivacaine            |                                                                                        |
| Yildirim <sup>16</sup>    | 2007 | 1 | Bypass surgery                       | 50              | NA |       | 10ml  | 0.5% ropivacaine          |                                                                                        |
| Salvaggio <sup>17</sup>   | 2008 | 5 | Facial Pain                          | 25              | NA |       | 10ml  | Levobupivacaine           |                                                                                        |
| Lipov <sup>18</sup>       | 2008 | 2 | Breast cancer survivors              | 13              | 0  | 0     | 7ml   | 0.5% bupivacaine          |                                                                                        |
| Goebel <sup>19</sup>      | 2008 | 1 | Chronic upper body pain syndromes    | 18              | 0  | 0     | 5ml   | Buprenorphine             |                                                                                        |
| Song <sup>20</sup>        | 2009 | 1 | Volunteers                           | 20              | 1  | 5     | 8ml   | 1% lidocaine              | dysphagia and dizziness                                                                |
| Nabil Abbas <sup>21</sup> | 2011 | 2 | Post mastectomy pain                 | 50 <sup>^</sup> | NA | 17.50 | 3ml   | 0.25% bupivacaine         | Hoarseness and lump sensation (8), cough (1), hematoma (17), brachial plexus block (9) |
| Makharita <sup>22</sup>   | 2012 | 2 | Fascial pain                         | 61 <sup>α</sup> |    | 13    | 21.31 | 8ml<br>0.125% bupivacaine | hoarseness (3), dysphagia (9), lower limb edema (1)                                    |

|                      |      |   |                                           |                  |    |   |     |                   |                        |                                            |
|----------------------|------|---|-------------------------------------------|------------------|----|---|-----|-------------------|------------------------|--------------------------------------------|
| Liu <sup>23</sup>    | 2013 | 1 | Severe trauma victims                     | 15               | NA |   | 8ml | 0.75% ropivacaine |                        |                                            |
| Othman <sup>24</sup> | 2014 | 1 | Breast cancer survivors                   | 20               |    | 2 | 10  | 10ml              | 0.5% bupivacaine       | Blood shot conjunctive (1), hoarseness (1) |
| Liu <sup>25</sup>    | 2014 | 1 | Bell's palsy                              | 48               |    | 0 | 0   | 10ml              | 1% lidocaine           |                                            |
| Guo <sup>26</sup>    | 2014 | 5 | Esophageal cancer                         | 20               | NA |   |     | NA                | 1% lidocaine           |                                            |
| Kumar <sup>27</sup>  | 2014 | 3 | Upper extremity orthopedic surgery        | 30 <sup>\$</sup> | NA |   |     | 3ml               | 2% lidocaine           |                                            |
| Walega <sup>28</sup> | 2014 | 2 | Postmenopausal women                      | 20               |    | 0 | 0   | 5ml               | 0.5% bupivacaine       |                                            |
| Guo <sup>29</sup>    | 2014 | 5 | Esophageal surgery                        | 15               | NA |   |     | NA                | 1% lidocaine           |                                            |
| Yeo <sup>30</sup>    | 2015 | 3 | Volunteers                                | 10               | NA |   |     | 7ml               | 1% lidocaine           |                                            |
| Chen <sup>31</sup>   | 2015 | 1 | Elective surgery under general anesthesia | 80               | NA |   |     | 10ml              | 1% lidocaine           |                                            |
| Choi <sup>32</sup>   | 2015 | 3 | Shoulder surgery                          | 20               |    | 0 | 0   | 4ml               | 0.375% Levobupivacaine |                                            |
| Park <sup>33</sup>   | 2015 | 3 | Breast cancer related lymphedema          | 32               |    | 0 | 0   | 4-5 ml            | 0.5% bupivacaine       |                                            |
| Maki <sup>34</sup>   | 2016 | 2 | Postmenopausal women                      | 40               |    | 0 | 0   | 5ml               | 0.5% bupivacaine       |                                            |
| Chen <sup>35</sup>   | 2016 | 3 | Laparoscopic cholecystectomy              | 40               | NA |   |     | 7ml               | 1% lidocaine           |                                            |

|                            |      |   |                              |    |    |       |     |                  |                                                          |
|----------------------------|------|---|------------------------------|----|----|-------|-----|------------------|----------------------------------------------------------|
| Hanling <sup>36</sup>      | 2016 | 3 | PTSD                         | 27 | NA | 13    | 5ml | 0.5% ropivacaine | ptosis, dyspnea, increased anger/aggression, sore throat |
| Leftheriotis <sup>37</sup> | 2016 | 1 | Atrial fibrillation          | 36 | 0  | 0     | 8ml | 1% lidocaine     |                                                          |
| Peng <sup>38</sup>         | 2017 | 3 | Thoracolumbar surgery        | 20 | 0  | 0     | 6ml | 1% lidocaine     |                                                          |
| Chen <sup>39</sup>         | 2017 | 1 | laparoscopic cholecystectomy | 30 | 0  | 0     | 7ml | 1% lidocaine     |                                                          |
| Kim <sup>40</sup>          | 2017 | 3 | SGNB patients                | 51 | 11 | 21.57 | 5ml | 0.5% mepivacaine | dizziness (4), hoarseness (7)                            |

**Supplemental Table 1:** Complications reported from registered randomized clinical trials (Cochrane Controlled Register of Trials- CENTRAL) evaluating SGNB. Abbreviations: SGNB- stellate ganglion nerve block, ml-milliliters, PTSD- Post traumatic stress disorder, USG- ultrasound guidance, CRPS- complex regional pain syndrome, RLN- recurrent laryngeal nerve.

Footnote Legends: \* SGNB number not specified. # 5ml in ultra sound arm and 8 ml in blind arm, \$ 15 received saline injection, ^200 SGNB performed,  $\alpha$  31 received saline,  $\beta$  frequency in parenthesis when reported in the manuscript.

## References:

1. Bonelli S, Conoscente F, Movilia PG, Restelli L, Francucci B, Grossi E. Regional intravenous guanethidine vs. Stellate ganglion block in reflex sympathetic dystrophies: A randomized trial. *Pain* 1983;16:297-307.
2. Harding SP, Lipton JR, Wells JC, Campbell JA. Relief of acute pain in herpes zoster ophthalmicus by stellate ganglion block. *British Medical Journal Clinical Research Ed*;292:1428.
3. Glynn C, Casale R. Morphine injected around the stellate ganglion does not modulate the sympathetic nervous system nor does it provide pain relief. *Pain* 1993;53:33-7.
4. Kapral S, Krafft P, Gosch M, Fleischmann D, Weinstabl C. Ultrasound imaging for stellate ganglion block: Direct visualization of puncture site and local anesthetic spread. A pilot study. *Regional Anesthesia*;20:323-8.
5. Ikeda T, Iwase S, Sugiyama Y et al. Stellate ganglion block is associated with increased tibial nerve muscle sympathetic activity in humans. *Anesthesiology* 1996;84:843-50.
6. Inada T, Uesugi F, Kawachi S, Inada K. Lidocaine tape relieves pain due to needle insertion during stellate ganglion block. *Canadian Journal of Anaesthesia*;44:259-62.
7. Otake T, Ieshima H, Ishida H, Ushigome Y, Saito S. Bone atrophy in complex regional pain syndrome patients measured by microdensitometry. *Can J Anaesth* 1998;45:831-8.
8. Price DD, Long S, Wilsey B, Rafii A. Analysis of peak magnitude and duration of analgesia produced by local anesthetics injected into sympathetic ganglia of complex regional pain syndrome patients. *Clinical Journal of Pain*;14:216-26.
9. Fujino M, Hisashi K, Yashima N et al. Treatment of sudden sensorineural hearing loss with a continuous epidural block. *Eur Arch Otorhinolaryngol* 1999;256 Suppl 1:S18-21.
10. Sugimoto M, Shimaoka M, Taenaka N, Kiyono H, Yoshiya I. Lymphocyte activation is attenuated by stellate ganglion block. *Regional Anesthesia & Pain Medicine*;24:30-5.
11. Yokoyama M, Nakatsuka H, Itano Y, Hirakawa M. Stellate ganglion block modifies the distribution of lymphocyte subsets and natural-killer cell activity. *Anesthesiology* 2000;92:109-115.
12. Arai YCP, Ogata J, Matsumoto Y et al. Preoperative stellate ganglion blockade prevents tourniquet-induced hypertension during general anesthesia. *Acta Anaesthesiologica Scandinavica* 2004;48:613-618.
13. Donmez A, Tufan H, Tutar N et al. In vivo and in vitro effects of stellate ganglion blockade on radial and internal mammary arteries. *Journal of Cardiothoracic & Vascular Anesthesia*;19:729-33.
14. Yildirim V, Doganci S, Yanarates O et al. Does preemptive stellate ganglion blockage increase the patency of radiocephalic arteriovenous fistula? *Scandinavian Cardiovascular Journal*;40:380-4.
15. Nishiyama T, Matsukawa T, Yamashita K. Comparison between neurotropin and mepivacaine for stellate ganglion injection. *Journal of Anesthesia* 2006;20:240-242.
16. Yildirim V, Akay HT, Bingol H et al. Pre-emptive stellate ganglion block increases the patency of radial artery grafts in coronary artery bypass surgery. *Acta Anaesthesiologica Scandinavica*;51:434-40.
17. Salvaggio I, Adducci E, Dell'aquila L et al. Facial pain: A possible therapy with stellate ganglion block. *Pain Medicine* 2008;9:958-962.
18. Lipov EG, Joshi JR, Sanders S et al. Effects of stellate-ganglion block on hot flushes and night awakenings in survivors of breast cancer: A pilot study. *Lancet Oncology*;9:523-32.
19. Goebel A, Lawson A, Allen S, Glynn C. Buprenorphine injection to the stellate ganglion in the treatment of upper body chronic pain syndromes. *European Journal of Pain* 2008;12:266-274.



20. Song JG, Hwang GS, Lee EH et al. Effects of bilateral stellate ganglion block on autonomic cardiovascular regulation. *Circulation Journal*;73:1909-13.
21. Nabil Abbas D, Abd El Ghafar EM, Ibrahim WA, Omran AF. Fluoroscopic stellate ganglion block for postmastectomy pain: A comparison of the classic anterior approach and the oblique approach. *Clinical Journal of Pain* 2011;27:207-213.
22. Makhirita MY, Amr YM, El-Bayoumy Y. Effect of early stellate ganglion blockade for facial pain from acute herpes zoster and incidence of postherpetic neuralgia. *Pain Physician* 2012;15:467-474.
23. Liu MH, Tian J, Su YP, Wang T, Xiang Q, Wen L. Cervical sympathetic block regulates early systemic inflammatory response in severe trauma patients. *Medical Science Monitor*;19:194-201.
24. Othman AH, Zaky AH. Management of hot flushes in breast cancer survivors: Comparison between stellate ganglion block and pregabalin. *Pain Medicine*;15:410-7.
25. Liu GD, He CJ. Stellate ganglion block promotes recovery of bell's palsy in patients with diabetes mellitus. *Acta Oto-Laryngologica* 2014;134:652-655.
26. Guo JR, Guo W, Jin XJ et al. Effects of stellate ganglionic block on hemodynamic changes and intrapulmonary shunt in perioperative patients with esophageal cancer. *European review for medical and pharmacological sciences* 2014;18:3864-3869.
27. Kumar N, Thapa D, Gombar S, Ahuja V, Gupta R. Analgesic efficacy of pre-operative stellate ganglion block on postoperative pain relief: A randomised controlled trial. *Anaesthesia* 2014;69:954-960.
28. Walega DR, Rubin LH, Banuvar S, Shulman LP, Maki PM. Effects of stellate ganglion block on vasomotor symptoms: Findings from a randomized controlled clinical trial in postmenopausal women. *Menopause* 2014;21:807-814.
29. Guo W, Jin XJ, Yu J et al. Effects of stellate ganglion block on the peri-operative vasomotor cytokine content and intrapulmonary shunt in patients with esophagus cancer. *Asian Pacific journal of cancer prevention : APJCP* 2014;15:9505-9509.
30. Yeo J, Jeon Y. Effects of stellate ganglion block on sedation as assessed by bispectral index in normal healthy volunteers. *Pain Physician* 2015;18:173-178.
31. Chen YQ, Jin XJ, Liu ZF, Zhu MF. Effects of stellate ganglion block on cardiovascular reaction and heart rate variability in elderly patients during anesthesia induction and endotracheal intubation. *Journal of Clinical Anesthesia* 2015;27:140-145.
32. Choi EM, Kim EM, Chung MH et al. Effects of ultrasound-guided stellate ganglion block on acute pain after arthroscopic shoulder surgery. *Pain Physician* 2015;18:E379-E388.
33. Park JH, Min YS, Chun SM, Seo KS. Effects of stellate ganglion block on breast cancer-related lymphedema: Comparison of various injectates. *Pain Physician* 2015;18:93-99.
34. Maki PM, Rubin LH, Savarese A et al. Stellate ganglion blockade and verbal memory in midlife women: Evidence from a randomized trial. *Maturitas* 2016;92:123-129.
35. Chen Y, Xie Y, Xue Y, Wang B, Jin X. Effects of ultrasound-guided stellate ganglion block on autonomic nervous function during co<sup>2</sup>-pneumoperitoneum a randomized double-blind control trial. *Journal of Clinical Anesthesia* 2016;32:255-261.
36. Hanling SR, Hickey A, Lesnik I et al. Stellate ganglion block for the treatment of posttraumatic stress disorder a randomized, double-blind, controlled trial. *Regional Anesthesia and Pain Medicine* 2016;41:494-500.
37. Leftheriotis D, Flevari P, Kossyvakis C et al. Acute effects of unilateral temporary stellate ganglion block on human atrial electrophysiological properties and atrial fibrillation inducibility. *Heart rhythm* 2016;13:2111-2117.
38. Peng K, Zhang J, Chen WR, Liu HY, Ji FH. Ultrasound-guided stellate ganglion block improves gastrointestinal function after thoracolumbar spinal surgery. *Clinical Therapeutics* 2017;39:2322-2330.

39. Chen YQ, Xie YY, Wang B, Jin XJ. Effect of stellate ganglion block on hemodynamics and stress responses during co<sup>2</sup>-pneumoperitoneum in elderly patients. *Journal of Clinical Anesthesia* 2017;37:149-153.
40. Kim WJ, Park HS, Yi MS, Koo GH, Shin HY. Evaluation of lung function and clinical features of the ultrasound-guided stellate ganglion block with 2 different concentrations of a local anesthetic: A randomized controlled trial. *Anesthesia and Analgesia* 2017;124:1311-1316.

## Appendix E. Articles describing complications associated with SGNB published between 1950-1989

1. Orkin LR, Papper EM, Rovenstine EA. The complications of stellate and thoracic sympathetic nerve blocks. *J Thorac Surg* 1950;20:911-22.
2. Pallin IM, Deutsch EV. Death following stellate ganglion block. *Ann Surg* 1951;133:226-33.
3. Bischof W. [complications after stellate ganglion block]. *Acta Neuroveg (Wien)* 1951;2:357-65.
4. Schmidt-Kessen W, Schmitt W. [auricular flutter caused by stellate ganglion block]. *Z Kreislaufforsch* 1951;40:599-604.
5. Van Noort HL. [fatal complications of bilateral stellate ganglion block]. *Ned Tijdschr Geneeskd* 1954;98:3788.
6. Baliusjuli R, Tornerbaduell C. [fatal complications of stellate ganglion infiltrations]. *Rev Esp Anesthesiol* 1963;10:192-200.
7. Magora F. An unusual complication after stellate ganglion block. A case report. *Br J Anaesth* 1964;36:379-80.
8. Moore DC. An unusual complication after stellate ganglion block. *Br J Anaesth* 1964;36:601.
9. Paulsen K, Reinhardt M. [nil nocere: The blockade of the stellate ganglion and its dangers]. *Munch Med Wochenschr* 1970;112:817-23.
10. Ono H, Mochizuki K, Matsumoto T. [a rare complication of stellate ganglion block--high spinal anesthesia caused by inadvertent subarachnoid injection]. *Masui* 1975;24:386-90.
11. Forrest JB. An unusual complication after stellate ganglion block by the paratracheal approach: A case report. *Can Anaesth Soc J* 1976;23:435-9.
12. Korevaar WC, Burney RG, Moore PA. Convulsions during stellate ganglion block: A case report. *Anesth Analg* 1979;58:329-30.
13. Price J, Hvidt V, Kuhl V. [stellate block. A case with a rare complication]. *Ugeskr Laeger* 1967;129:1750-2.
14. Donvig M. [spinal anesthesia as a complication in sympathetic ganglion block]. *Ugeskr Laeger* 1967;129:421-3.
15. Truebe-Becker E. [stellate ganglion punctures and malpractice]. *Acta Med Leg Soc (Liege)* 1964;17:87-96.
16. Kozody R, Ready LB, Barsa JE, Murphy TM. Dose requirement of local anaesthetic to produce grand mal seizure during stellate ganglion block. *Can Anaesth Soc J* 1982;29:489-91.
17. Scott DL, Ghia JN, Teeple E. Aphasia and hemiparesis following stellate ganglion block. *Anesth Analg* 1983;62:1038-40.
18. Allen G, Samson B. Contralateral horner's syndrome following stellate ganglion block. *Can Anaesth Soc J* 1986;33:112-3.
19. Ellis JS, Jr., Ramamurthy S. Seizure following stellate ganglion block after negative aspiration and test dose. *Anesthesiology* 1986;64:533-4.
20. Szeinfeld M, Laurencio M, Pallares VS. Total reversible blindness following attempted stellate ganglion block. *Anesth Analg* 1981;60:689-90.
21. Thompson KJ, Melding P, Hatangdi VS. Pneumochylothorax: A rare complication of stellate ganglion block. *Anesthesiology* 1981;55:589-91.
22. McCallum MI, Glynn CJ. Intercostal neuralgia following stellate ganglion block. An infrequent complication. *Anaesthesia* 1986;41:850-2.
